# Supplementary material
Source: publisher site journal article supplement (http://kjim.org/upload/media/kjim-2021-313-suppl.pdf)
Supplement: Supplementary file 1 [file kjim-2021-313-suppl.pdf]

**Supplementary Table 1. Baseline characteristics of subjects according to the incident ESRD**

| Group                                       | None ESRD (n = 138,082) | ESRD (n = 2,082) | p value  |
|---------------------------------------------|-------------------------|------------------|----------|
| Age, yr                                     | 63.39 ± 10.63           | 65.39 ± 9.87     | < 0.0001 |
| Male sex                                    | 97,897 (70.9)           | 1,451 (69.69)    | 0.2296   |
| Current smoker                              | 41,174 (29.82)          | 539 (25.89)      | < 0.0001 |
| Heavy drinker                               | 8,958 (6.49)            | 76 (3.65)        | < 0.0001 |
| Physical activity-regular                   | 28,386 (20.56)          | 355 (17.05)      | < 0.0001 |
| Income-low                                  | 29,846 (21.61)          | 552 (26.51)      | < 0.0001 |
| Diabetes mellitus                           | 44,078 (31.92)          | 1,562 (75.02)    | < 0.0001 |
| HTN                                         | 95,743 (69.34)          | 1,945 (93.42)    | < 0.0001 |
| CVD                                         | 27,635 (20.01)          | 698 (33.53)      | < 0.0001 |
| Heart failure                               | 11,879 (8.60)           | 359 (17.24)      | < 0.0001 |
| Cancer                                      | 5,164 (3.74)            | 100 (4.80)       | 0.0113   |
| Dyslipidemia                                | 70,411 (50.99)          | 1,373 (65.95)    | < 0.0001 |
| CKD (eGFR < 60 mL/min/1.73 m <sup>2</sup> ) | 19,562 (14.17)          | 1,659 (79.68)    | < 0.0001 |
| 15 ≤ eGFR < 30 mL/min/1.73 m <sup>2</sup>   | 439 (0.32)              | 599 (28.77)      | < 0.0001 |
| eGFR < 15 mL/min/1.73 m <sup>2</sup>        | 802 (0.58)              | 250 (12.01)      | < 0.0001 |
| Proteinuria                                 |                         |                  | < 0.0001 |
| Negative                                    | 125,014 (91.21)         | 728 (35.34)      |          |
| Trace                                       | 4,326 (3.16)            | 88 (4.27)        |          |
| 1+                                          | 4,361 (3.18)            | 296 (14.37)      |          |
| 2+                                          | 2,407 (1.76)            | 482 (23.4)       |          |
| 3+                                          | 805 (0.59)              | 369 (17.91)      |          |
| 4+                                          | 152 (0.11)              | 97 (4.71)        |          |
| eGFR, mL/min/1.73 m <sup>2</sup>            | 81.81 ± 40.81           | 41.3 ± 27.69     | < 0.0001 |
| BMI, kg/m <sup>2</sup>                      | 24.66 ± 3.01            | 24.51 ± 3.19     | 0.0251   |
| Glucose, mg/dL                              | 112.17 ± 38.1           | 136.02 ± 67.9    | < 0.0001 |
| Total cholesterol, mg/dL                    | 205.23 ± 46.21          | 203.61 ± 57.21   | 0.113    |
| SBP, mmHg                                   | 130.1 ± 15.94           | 137.51 ± 19.57   | < 0.0001 |
| DBP, mmHg                                   | 79.04 ± 10.33           | 80.1 ± 12.12     | < 0.0001 |
| F/U duration, person-years                  | 5.5 ± 1.93              | 2.54 ± 1.96      | < 0.0001 |

Values are presented as mean ± standard deviation or number (%).

ESRD, end-stage renal disease; HTN, hypertension; CVD, cardiovascular disease; CKD, chronic kidney disease; eGFR, estimated glomerular filtration rate; BMI, body mass index; SBP, systolic blood pressure; DBP, diastolic blood pressure; F/U, follow-up.
